# Supplementary material
Source: Research Square preprint supplement (doi:10.21203/rs.3.rs-9182002/v1)
Supplement: Supplementary file 1 [file 5175dc42fbd93b3fc6c3c7a2.docx]

**Figure 1: Examples of radiological signs of osteomalacia from our patients’ records.**


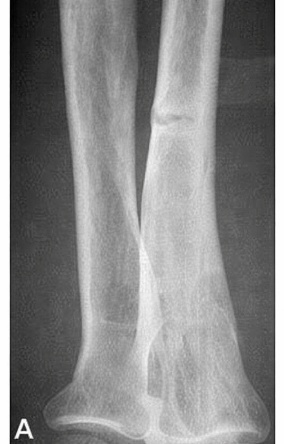


Looser-Milkman zones in the ulna (A)


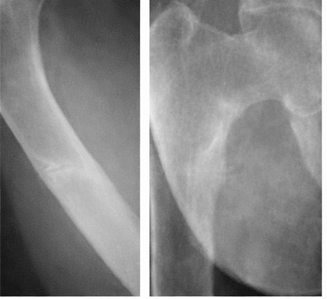


Looser-Milkman zones in the femur (B,C)


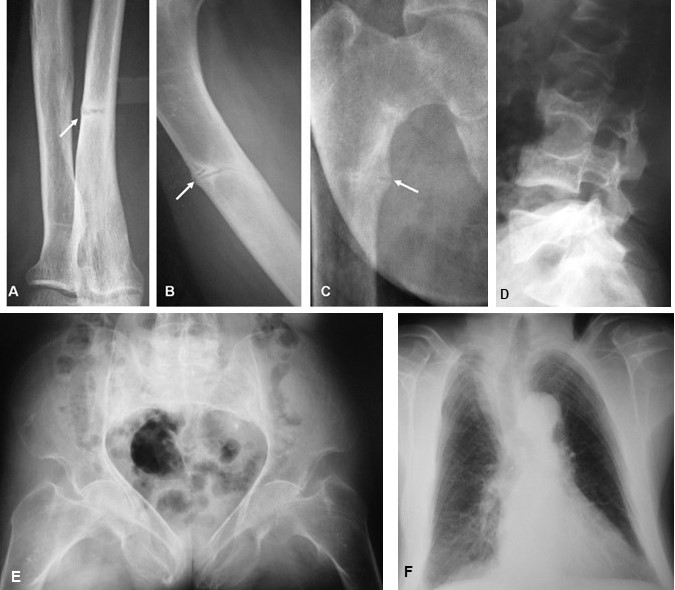


Lumbar vertebral fractures with fuzzy demineralization (D)


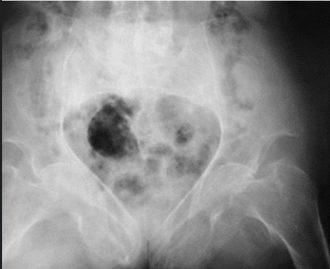


triradiate pelvis deformation (E)


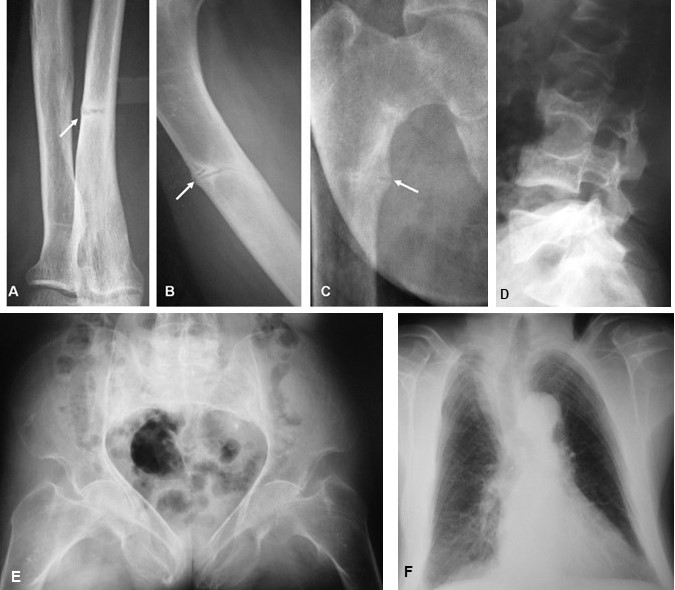


bell-shaped thorax deformation (F).
